# Supplementary material
Source: PubMed Central journal article supplement (PMC3059014)
Supplement: supp_M110.185124_jbc.M110.185124-1.pdf [file supp_M110.185124_jbc.M110.185124-1.pdf]

## SUPPLEMENTAL DATA

### SUPPLEMENTAL FIGURE LEGENDS

**Figure S1. The expression of EZH2 protein during neuronal differentiation.** hMSCs were induced to neuronal differentiation. The protein expression of EZH2 at indicated time interval was determined by Western blotting.  $\beta$ -actin was used as an internal control.

**Figure S2. The intracellular  $\text{Ca}^{2+}$  contents of different transfectants of hMSCs during neuronal differentiation.** hMSCs containing mock, EZH2 shRNA, or both EZH2 and PIP5K1C shRNAs were induced to neuronal differentiation for 0, 1, and 5 days. Cells were collected at each time interval, and applied to measure the intracellular  $\text{Ca}^{2+}$  contents with Fluo4-AM by flow cytometry. The relative  $\text{Ca}^{2+}$  level was compared to that in mock transfectant at 0 h, and the results are shown as a bar graph in the lower panel of Fig. 6A.

### SUPPLEMENTAL FIGURES

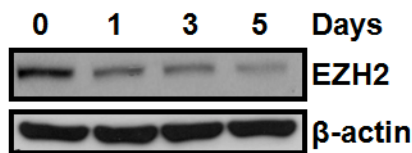

**Figure S1**

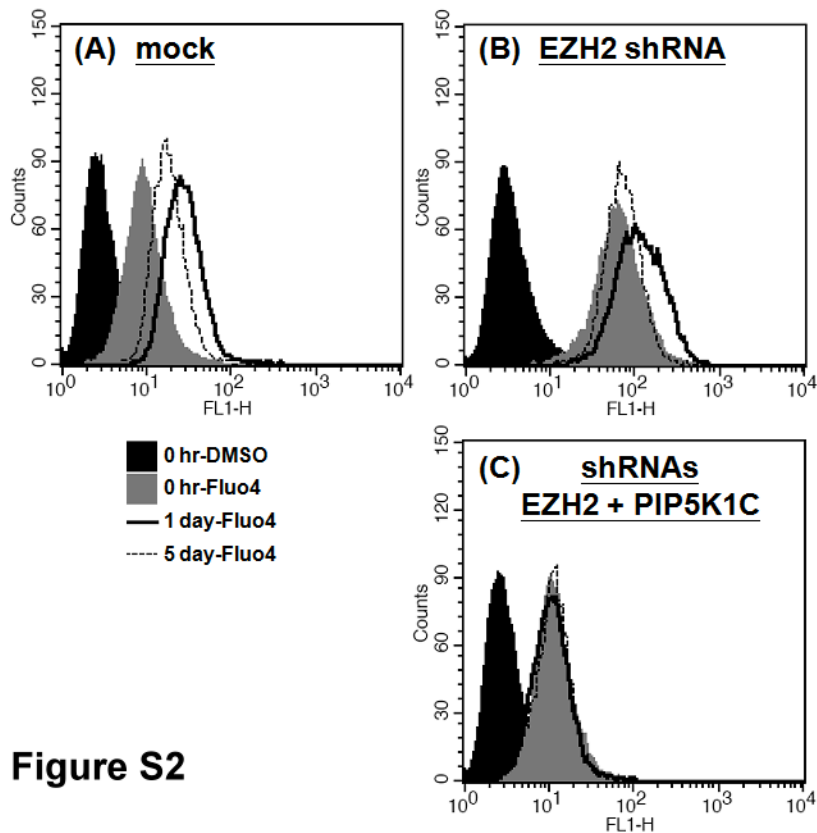

**Figure S2**
